# Supplementary material
Source: PubMed Central journal article supplement (PMC2692627)

**Supplemental information for “Methylene tetrahydrofolate dehydrogenase/cyclohydrolase and the synthesis of 10-CHO-THF are essential in *Leishmania major*”, by Silvano M. F. Murta, Tim J. Vickers, David A. Scott, and Stephen M. Beverley.**

Supplemental methods

*Expression and purification of recombinant LmjDHCH1*

The pET15b-*LmjDHCH1* vector was transformed into *E. coli* strain Rosetta2(DE3)/pLysS. Cells were grown at 37°C in 800 ml LB media containing 100 µg ml<sup>-1</sup> carbenicillin and 12.5 µg ml<sup>-1</sup> chloramphenicol to an OD of 0.6. Expression was induced for 4 h with 1 mM isopropyl-β-D-galactopyranoside and the cells then harvested and frozen.

Frozen cells were thawed on ice and resuspended in 30 ml of lysis buffer (75 mM Na-phosphate, pH 7.5, 500 mM NaCl, 1 mM benzamidine, 3 µg ml<sup>-1</sup> leupeptin, 250 µM 4-(2-aminoethyl)benzenesulphonyl fluoride, 10 U ml<sup>-1</sup> DNAase I (Sigma), 10,000 U ml<sup>-1</sup> lysozyme (Sigma), 1 mM 2-mercaptoethanol, 10% (v/v) glycerol). The cells were then lysed by sonication, (4 x 30 s bursts), with cooling to <4°C between pulses. An identical extraction procedure was used to produce extracts of *L. major* for enzyme assay. After centrifugation (30,000 x g, 1 h, 4°C), clarified extract was applied at 2 ml min<sup>-1</sup> at 4°C to a nickel-charged 20 ml (1.2 x 11 cm) Ni-NTA chelating agarose column (Qiagen) equilibrated with binding buffer (50 mM Na-phosphate, pH 7.5, 200 mM NaCl, 10% (v/v) glycerol). Unbound protein was removed by washing with 50 ml of binding buffer. Retained proteins were eluted with a linear gradient at 1 ml min<sup>-1</sup> of 0-100% of elution buffer containing (50 mM Na-phosphate, pH 7.5, 200 mM NaCl, 10% (v/v) glycerol, 500 mM imidazole). Fractions containing DHCH1 were pooled.

### *Western blot analysis*

Whole cell lysates from *L. major* lines were prepared from stationary phase parasites in SDS sample buffer;  $5 \times 10^6$  cell equivalents/lane. The samples were separated by electrophoresis on a 10% SDS polyacrylamide gel and electrotransferred onto nitrocellulose membranes (Hybond-ECL; Amersham Biosciences). Antiserum raised against *Lmj*DHCH1 and *Lmj*FTL were used at a 1:3,000 and 1:1,000 dilution, respectively. Secondary antibodies conjugated to peroxidase were from Amersham Biosciences, and ECL reactions were conducted using PerkinElmer Life Sciences chemiluminescence kit. In western blot analysis both the anti-FTL and DHCH1 antisera identify a major protein band of the expected molecular weights. The assignment of these bands to FTL and DHCH1 was confirmed by western blots against null or overexpressor mutants.

**Table S1. Oligonucleotide primers used in this work.**

| Primer number | Sequence                                   |
|---------------|--------------------------------------------|
| SMB 3528      | <u>CATATG</u> CCGTCTGCTCAGATCATTGA         |
| SMB 3529      | <u>GGATCC</u> CTATGATACGCCCAACGCAGCCT      |
| SMB 2557      | ggtaacggtgCGGGctgacCCACCATGACCGAGTACAAGCCC |
| SMB 2558      | cgagatcccacgtaaggtgcTCAGGCACCGGGCTTGCG     |
| SMB 2561      | ggtaacggtgCGGGctgacCCACCATGAAAAGCCTGAACTC  |
| SMB 2562      | cgagatcccacgtaaggtgcCTATTCCTTTGCCCTCG      |
| SMB 2656      | cgtcagcccgcaccgttaccATGATCTGAGCAGACGGCATC  |
| SMB 2657      | gcaccttacgtgggatctcgGGCACGTGCGCTCCACTTC    |
| SMB 2731      | CGTGTGACACTTTCAAGGTGCGA                    |
| SMB 2771      | ATTCGACGTTGCTTGCGGT                        |
| SMB 2772      | <u>GCATGC</u> ACGCAAACGGATTGGATGTGT        |
| SMB 2773      | <u>GGATCC</u> CACGTGTCTTTGGAACAGAGTG       |
| SMB 3123      | <u>AGATCT</u> CCACCATGGCCACCCGGAAGCTGCA    |
| SMB 3124      | <u>AGATCT</u> TTACGAAAGACCCACAATCC         |
| SMB 3125      | <u>AGATCT</u> CCACCATGCCGTCTGCTCAGATCAT    |
| SMB 3126      | <u>AGATCT</u> CTATGATACGCCCAACGCAG         |

Restriction sites are underlined small type is linker sequence.

**Figure S1. Purified *LmDHCH1*.**

A 5 µg sample of purified recombinant DHCH1 was separated on a 12% SDS-PAGE gel and stained with Coomassie Blue.

**Figure S2. Alignment of human cytoplasmic and mitochondrial DHCH domains with *Leishmania major* DHCH1.**

The sequences are *L. major* DHCH1 and the DHCH domains of the human cytoplasmic C1-synthase (Swiss-Prot P11586) and mitochondrial DHCH (P13995). Residues identical in all three proteins are shown boxed and shaded. Structural features have been depicted based upon the structure of the human C1-synthase DHCH domain (Schmidt et al., 2000). The active site lysine (K56, ▼) and proximal residues (\*) as well as Arg173 implicated in NADP<sup>+</sup> binding are marked (\*). Residues implicating in NADP<sup>+</sup> binding are shown boxed with a blue outline, while residues implicated in DHCH inhibitor binding are shown boxed with a gray outline.

**Figure S3. PCR confirming heterozygous *DHCH1* replacements.**

PCR tests of planned *HYG* (A) or *PAC* (B) replacements at *DHCH1*. Homologous replacement was visualized by PCR amplification using a primer located on the *DHCH1* chromosome outside of the targeting fragment on the 5' site (SMB2731) and a primer directed against sequences located with the *HYG* (SMB2562) or *PAC* ORF (SMB2558) within the targeting fragment. The sizes of the predicted PCR products are shown (C). #1-4, four independent heterozygous lines with *HYG* replacement +/- *HYG* and #1-12, twelve independent heterozygous lines with *PAC* replacement +/- *PAC*.

**Figure S4. Overexpression of FTL in pXNG4-FTL transfectants**

Western blot analysis of FTL protein detected with polyclonal rabbit antisera against *Lmj*FTL (1:1,000) (Vickers et al., 2008) in extracts of the *L. major* WT, WT+pXNG4-FTL and heterozygous +/*PAC* or +/*HYG* lines transfected with pXNG4-FTL. Protein loading was assessed with a rabbit anti-*L. major* histone H2A polyclonal antibody (Iris Wong and Stephen M. Beverley, manuscript in preparation) at 1: 100,000 dilution.

Fig. S1 Purification of recombinant *L. major* DHCH1 protein

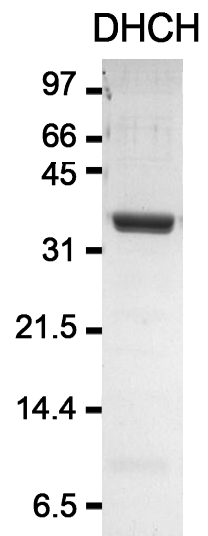

**Fig. S2. Alignment of human DHCH domains and *Leishmania major* DHCH1**

showing homology (shading) and features based on human cDHCH domain structure (Schmidt *et al* 2000)

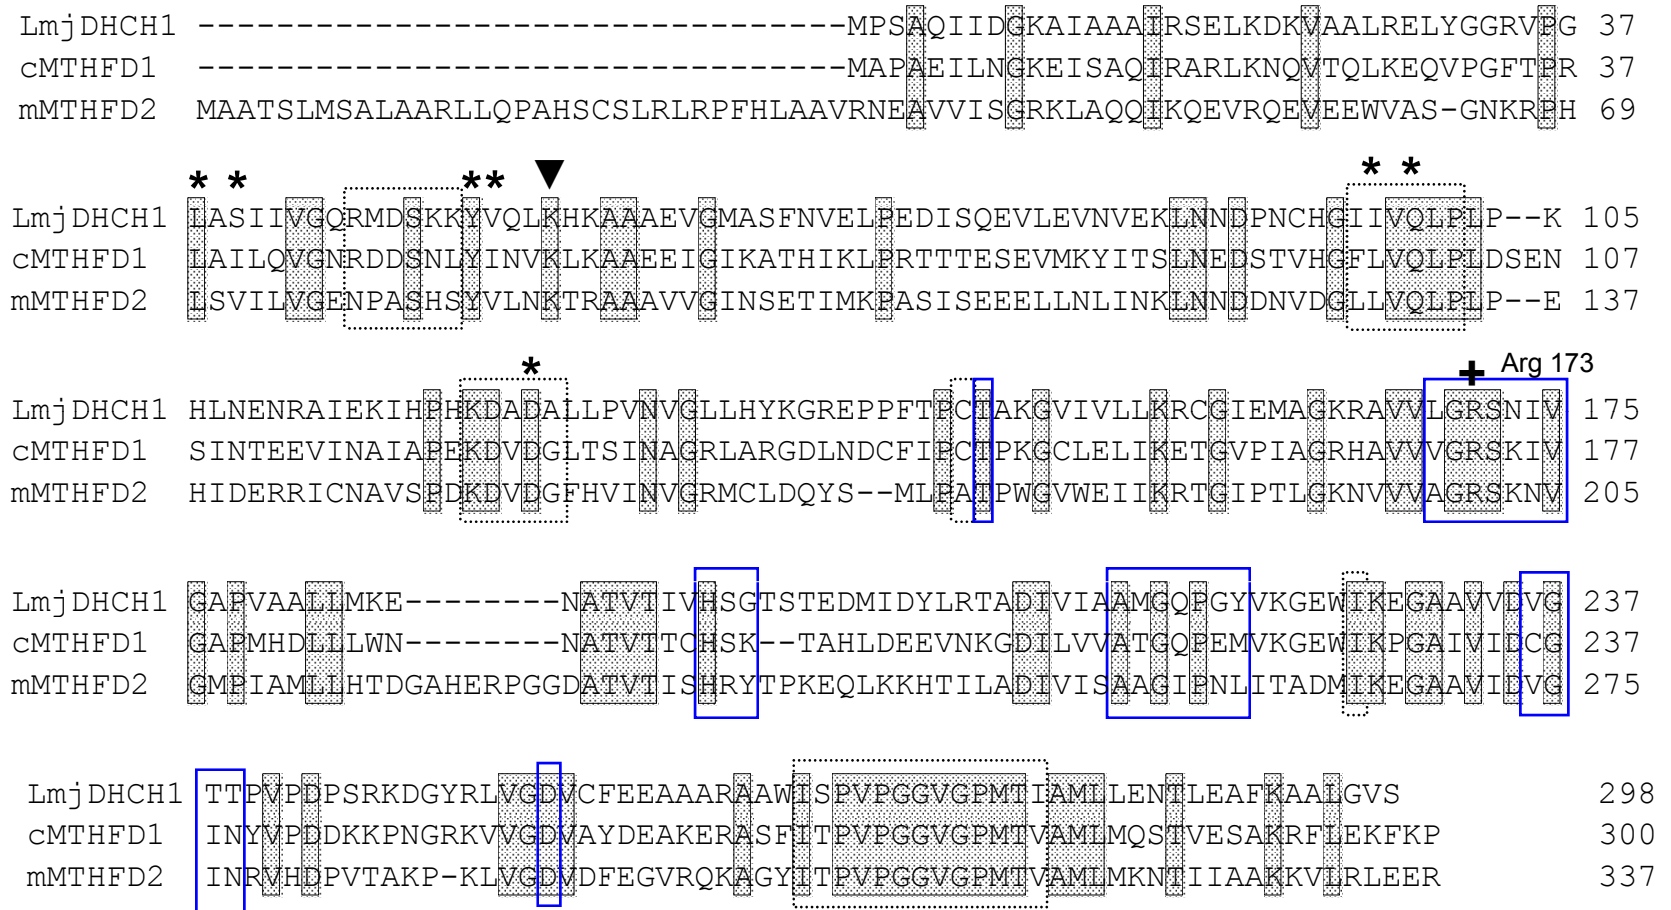

▼ Lys 56 (catalytic site)

\* active site

□ NADP+

⋯ Inhibitor binding

Fig. S3 PCR confirming *DHCH1* heterozygotes

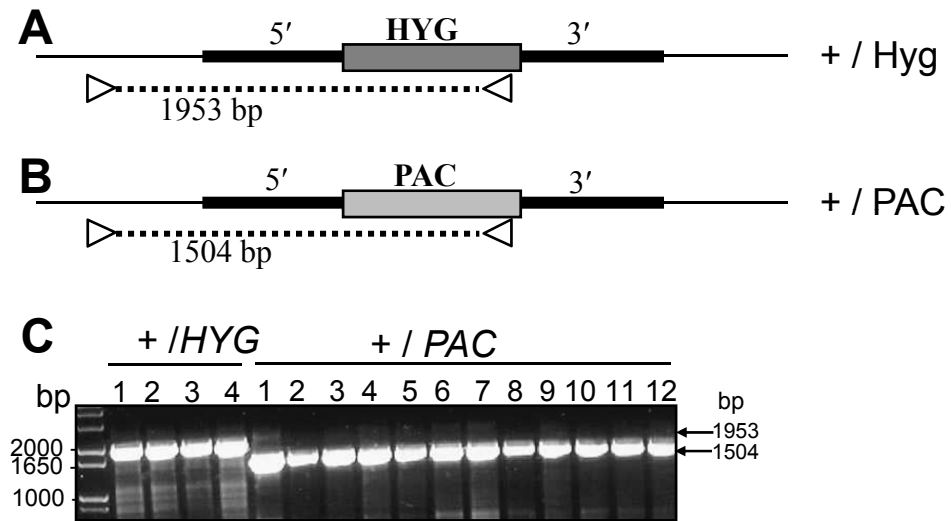



Fig. S4 Overexpression of FTL in pXNG4-FTL transfectants

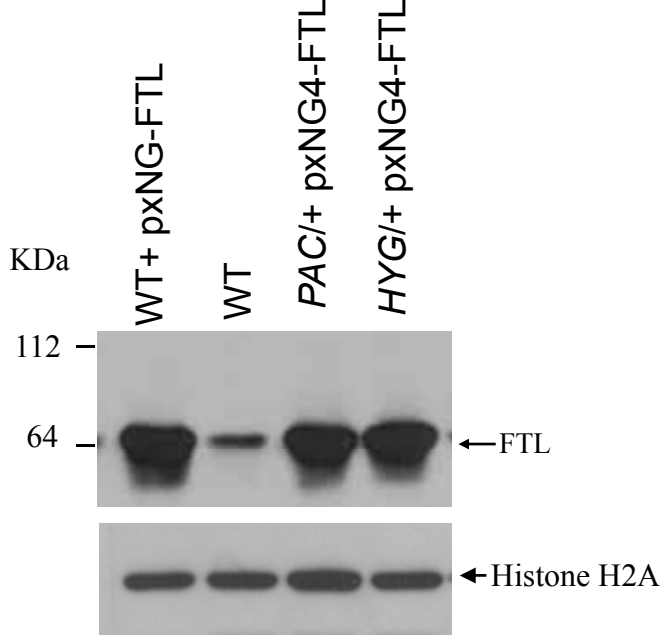

Supplement: NIHMS107702-supplement-supplement_1.pdf [file NIHMS107702-supplement-supplement_1.pdf]
